# Supplementary material
Source: Springer Nature journal article supplement (https://www.springermedizin.de/resource/supplementary/12875_2013_1023_MOESM2_ESM.pdf/9435958)

Institutional  
Field

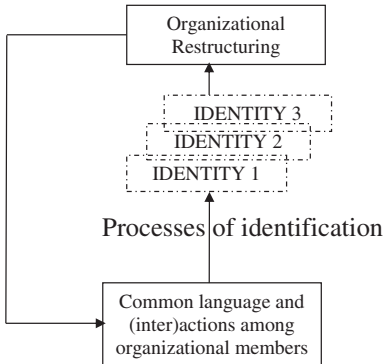

Supplement: MOESM2 [file 9435958]
